# Supplementary material for: Impact of skin, musculoskeletal and psychosocial aspects on quality of life in psoriatic arthritis patients: A cross-sectional study of outpatient clinic patients in the biologic treatment era
Source: PubMed Central journal article supplement — RMD Open. 2020 May 14;6(1):e001223. doi: 10.1136/rmdopen-2020-001223 (PMC7299507; doi:10.1136/rmdopen-2020-001223), 2020-05-14
Supplement: rmdopen-2020-001223s001.pdf [file rmdopen-2020-001223s001.pdf]

## Supplement file

Supplementary Table 1a. Associations with the health related quality of life measure 15D in male psoriatic arthritis patients tested in univariate and multivariate linear regression models.

Only variables with a p value < 0.10 in the univariate analyses were tested in the multivariate analysis, which was adjusted for age and BMI independent of their significance in the univariate analyses. Apart from age and BMI only variables with at p value < 0.01 is displayed in the multivariate analysis.

|                                      | Univariate analyses     |                     | Adjusted analyses       |       |
|--------------------------------------|-------------------------|---------------------|-------------------------|-------|
|                                      | B (95% CI)              | p value             | B (95% CI)              | p *   |
| Age, years                           | -0.001 (-0.003, 0.002)  | 0.59                | -0.001 (-0.003, 0.000)  | 0.13  |
| Male gender                          | NA                      |                     | NA                      |       |
| BMI, kg/m <sup>2</sup>               | -0.005 (-0.011, 0.001)  | 0.12                | 0.002 (-0.001, 0.006)   | 0.23  |
| Current smoking                      | -0.072 (-0.137, -0.007) | 0.030               |                         |       |
| Part time/full time employed/working | 0.092 (0.048, 0.136)    | <0.001              |                         |       |
| PsA disease duration, years          | -0.004 (-0.007, -0.001) | 0.015               |                         |       |
| CRP, mg/L                            | 0.001 (-0.002, 0.003)   | 0.60                |                         |       |
| TJC68                                | -0.003 (-0.005, -0.001) | 0.003 <sup>†</sup>  |                         |       |
| SJC66                                | -0.005 (-0.026, 0.015)  | 0.60                |                         |       |
| DAPSA, range 0-164                   | -0.004 (-0.005, -0.002) | <0.001              |                         |       |
| PASDAS, **                           | -0.082 (-0.127, -0.037) | 0.001               |                         |       |
| MASES, range 0-13                    | -0.013 (-0.022, -0.005) | 0.004               |                         |       |
| IGA, VAS 0-100 mm                    | -0.002 (-0.004, -0.001) | 0.005               |                         |       |
| PGA, VAS 0-100 mm                    | -0.003 (-0.004, -0.002) | <0.001 <sup>†</sup> |                         |       |
| Pain, VAS 0-100 mm                   | -0.003 (-0.003, -0.002) | <0.001              |                         |       |
| Fatigue, VAS 0-100 mm                | -0.002 (-0.003, -0.002) | <0.001              | -0.001 (-0.002, -0.000) | 0.007 |
| Morning stiffness, hour              | -0.028 (-0.044, -0.012) | 0.001               |                         |       |
| Sleep disturbance, NRS 0-10          | -0.025 (-0.031, -0.019) | <0.001              | -0.008 (-0.015, -0.000) | 0.040 |
| Anxiety/depression, range 1-3        | -0.091 (-0.129, -0.053) | <0.001              | -0.037 (-0.065, -0.008) | 0.013 |

|                                                                       |                         |        |  |  |
|-----------------------------------------------------------------------|-------------------------|--------|--|--|
| MHAQ, range 0-3                                                       | -0.174 (-0.231, -0.118) | <0.001 |  |  |
| Exercise ≥1 time per week                                             | 0.018 (-0.028, 0.065)   | 0.43   |  |  |
| Power Doppler signal present in any joints, entheses or tendons       | -0.021 (-0.067, 0.025)  | 0.37   |  |  |
| Power Doppler sum score in joints, entheses and tendons (range 0-347) | 0.002 (-0.009, 0.013)   | 0.70   |  |  |
| Comorbidities ≥ 1                                                     | -0.035 (-0.083, 0.013)  | 0.15   |  |  |
| PASI, range 0-72                                                      | -0.005 (-0.010, 0.000)  | 0.067  |  |  |
| DLQI, range 0-30                                                      | -0.009 (-0.016, -0.003) | 0.004  |  |  |
| Current bDMARD                                                        | -0.054 (-0.098, -0.009) | 0.019  |  |  |
| Current csDMARD                                                       | -0.019 (-0.067, 0.029)  | 0.43   |  |  |
| Ever bDMARD                                                           | -0.055 (-0.099, -0.011) | 0.016  |  |  |
| Ever csDMARD                                                          | -0.043 (-0.117, 0.031)  | 0.25   |  |  |

† Not in the final multivariate model

\*With DAPSA in the model.

\*\*The independent associations remained the same when DAPSA was replaced by PASDAS in the model.

CI, Confidence intervals; BMI, Body Mass Index; PsA, Psoriatic arthritis; CRP, C-Reactive Protein; TJC, Tender Joint Count; SJC, Swollen Joint Count; DAPSA, Disease Activity index for Psoriatic Arthritis; PASDAS, Psoriatic Arthritis Disease Activity Score; MASES, Maastricht Ankylosing Spondylitis Enthesitis Score; IGA, Investigator Global Assessment; VAS, Visual analogue scale; PGA, Patient Global Assessment; NRS, Numeric Rating Scale; MHAQ, Modified Health Assessment Questionnaire; PASI, Psoriasis Area Severity Index; DLQI, Dermatology Life Quality Index; bDMARDs: Biologic Disease Modifying Anti-Rheumatic Drugs; csDMARDs: Conventional synthetic DMARDs.

Supplementary table 1b. Associations with the health related quality of life measure 15D in female psoriatic arthritis patients tested in univariate and multivariate linear regression models.

Only variables with a p value < 0.10 in the univariate analyses were tested in the multivariate analysis, which was adjusted for age and BMI independently of their significance in the univariate analyses. Apart from age and BMI only variables with at p value < 0.01 is displayed in the multivariate analysis.

|                                      | Univariate analyses     |                     | Adjusted analyses       |        |
|--------------------------------------|-------------------------|---------------------|-------------------------|--------|
|                                      | B (95% CI)              | p value             | B (95% CI)              | p *    |
| Age, years                           | -0.002 (-0.004, 0.001)  | 0.19                | 0.000 (-0.002, 0.001)   | 0.81   |
| Male gender                          | NA                      |                     | NA                      |        |
| BMI, kg/m <sup>2</sup>               | -0.004 (-0.009, 0.001)  | 0.14                | 0.001 (-0.002, 0.005)   | 0.51   |
| Current smoking                      | -0.044 (-0.108, 0.021)  | 0.18                |                         |        |
| Part time/full time employed/working | 0.065 (0.017, 0.113)    | 0.009               | 0.027 (-0.002, 0.057)   | 0.071  |
| PsA disease duration, years          | 0.003 (-0.002, 0.007)   | 0.21                |                         |        |
| CRP, mg/L                            | -0.005 (-0.010, 0.001)  | 0.10                |                         |        |
| TJC68                                | -0.003 (-0.005, -0.001) | 0.005 <sup>†</sup>  |                         |        |
| SJC66                                | 0.000 (-0.027, 0.026)   | 0.97                |                         |        |
| DAPSA, range 0-164                   | -0.003 (-0.005, -0.002) | <0.001              |                         |        |
| PASDAS, **                           | -0.101 (-0.156, -0.045) | 0.001               |                         |        |
| MASES, range 0-13                    | -0.011 (-0.018, -0.004) | 0.004               |                         |        |
| IGA, VAS 0-100 mm                    | -0.002 (-0.004, 0.000)  | 0.050               |                         |        |
| PGA, VAS 0-100 mm                    | -0.003 (-0.004, -0.002) | <0.001 <sup>†</sup> |                         |        |
| Pain, VAS 0-100 mm                   | -0.003 (-0.004, -0.002) | <0.001              |                         |        |
| Fatigue, VAS 0-100 mm                | -0.002 (-0.003, -0.001) | <0.001              |                         |        |
| Morning stiffness, hour              | -0.021 (-0.042, 0.000)  | 0.047               |                         |        |
| Sleep disturbance, NRS 0-10          | -0.022 (-0.028, -0.016) | <0.001              | -0.010 (-0.017, -0.003) | 0.008  |
| Anxiety/depression, range 1-3        | -0.090 (-0.123, -0.057) | <0.001              | -0.046 (-0.070, -0.021) | <0.001 |
| MHAQ, range 0-3                      | -0.165 (-0.204, -0.125) | <0.001              | -0.065 (-0.114, -0.016) | 0.010  |

|                                                                       |                         |       |                         |       |
|-----------------------------------------------------------------------|-------------------------|-------|-------------------------|-------|
| Exercise ≥1 time per week                                             | 0.041 (-0.010, 0.091)   | 0.11  |                         |       |
| Power Doppler signal present in any joints, entheses or tendons       | 0.014 (-0.036, 0.065)   | 0.57  |                         |       |
| Power Doppler sum score in joints, entheses and tendons (range 0-347) | 0.003 (-0.012, 0.018)   | 0.66  |                         |       |
| Comorbidities ≥ 1                                                     | -0.067 (-0.116, -0.017) | 0.009 | -0.041 (-0.073, -0.010) | 0.011 |
| PASI, range 0-72                                                      | 0.000 (-0.009, 0.008)   | 0.92  |                         |       |
| DLQI, range 0-30                                                      | -0.005 (-0.012, 0.001)  | 0.12  |                         |       |
| Current bDMARD                                                        | 0.035 (-0.022, 0.092)   | 0.23  |                         |       |
| Current csDMARD                                                       | 0.000 (-0.051, 0.051)   | 1.00  |                         |       |
| Ever bDMARD                                                           | 0.021 (-0.034, 0.075)   | 0.45  |                         |       |
| Ever csDMARD                                                          | -0.036 (0.117, 0.045)   | 0.38  |                         |       |

† Not in the final multivariate model

\*With DAPSA in the model.

\*\*The independent associations remained the same when DAPSA was replaced by PASDAS in the model.

CI, Confidence intervals; BMI, Body Mass Index; PsA, Psoriatic arthritis; CRP, C-Reactive Protein; TJC, Tender Joint Count; SJC, Swollen Joint Count; DAPSA, Disease Activity index for Psoriatic Arthritis; PASDAS, Psoriatic Arthritis Disease Activity Score; MASES, Maastricht Ankylosing Spondylitis Enthesitis Score; IGA, Investigator Global Assessment; VAS, Visual analogue scale; PGA, Patient Global Assessment; NRS, Numeric Rating Scale; MHAQ, Modified Health Assessment Questionnaire; PASI, Psoriasis Area Severity Index; DLQI, Dermatology Life Quality Index; bDMARDs: Biologic Disease Modifying Anti-Rheumatic Drugs; csDMARDs: Conventional synthetic DMARDs.

Supplementary Table 2a. Associations with the skin quality of life measure DLQI in male psoriatic arthritis patients tested in univariate and multivariate linear regression models.

Only variables with a p value < 0.10 in the univariate analyses were tested in the multivariate analysis, which was adjusted for age and BMI independently of their significance in the univariate analyses. Apart from age and BMI only variables with at p value < 0.01 is displayed in the multivariate analysis.

|                                      | Univariate analyses     |         | Adjusted analyses       |          |
|--------------------------------------|-------------------------|---------|-------------------------|----------|
|                                      | B (95% CI)              | p value | B (95% CI)              | p value* |
| Age, years                           | -0.096 (-0.178, -0.013) | 0.025   | -0.095 (-0.161, -0.028) | 0.006    |
| Male gender                          | NA                      |         | NA                      |          |
| BMI, kg/m <sup>2</sup>               | 0.127 (-0.100, 0.353)   | 0.27    | 0.013 (-0.174, 0.199)   | 0.89     |
| Current smoking                      | -0.228 (-2.762, 2.305)  | 0.86    |                         |          |
| Part time/full time employed/working | -1.730 (-3.553, 0.094)  | 0.063   |                         |          |
| PsA disease duration, years          | -0.030 (-0.155, 0.095)  | 0.64    |                         |          |
| CRP, mg/L                            | 0.054 (-0.025, 0.134)   | 0.18    |                         |          |
| TJC68 (n=130)                        | -0.002 (-0.088, 0.083)  | 0.96    |                         |          |
| SJC66 (n=130)                        | -0.064 (-0.843, 0.715)  | 0.87    |                         |          |
| DAPSA, range 0-164                   | 0.038 (-0.028, 0.105)   | 0.25    |                         |          |
| PASDAS,                              | 2.960 (1.237, 4.682)    | 0.001   | 2.091 (0.546, 3.635)    | 0.009    |
| MASES, range 0-13                    | 0.240 (-0.115, 0.594)   | 0.18    |                         |          |
| IGA, VAS 0-100 mm                    | 0.073 (0.008, 0.138)    | 0.028   |                         |          |
| PGA, VAS 0-100 mm                    | 0.066 (0.032, 0.101)    | <0.001† |                         |          |
| Pain, VAS 0-100 mm                   | 0.055 (0.018, 0.092)    | 0.004   |                         |          |
| Fatigue, VAS 0-100 mm                | 0.045 (0.019, 0.071)    | 0.001   | 0.026 (-0.001, 0.053)   | 0.062    |
| Morning stiffness, hour              | 0.725 (0.083, 1.367)    | 0.028   |                         |          |
| Sleep disturbance, NRS 0-10          | 0.341 (0.028, 0.655)    | 0.033   | -0.309 (-0.649, 0.032)  | 0.075    |
| Anxiety/depression, range 1-3        | 0.805 (-0.844, 2.454)   | 0.33    |                         |          |
| MHAQ, range 0-3                      | 4.172 (1.699, 6.645)    | 0.001   |                         |          |

|                                                                       |                        |        |                      |        |
|-----------------------------------------------------------------------|------------------------|--------|----------------------|--------|
| Exercise ≥1 time per week                                             | -1.274 (-2.997, 0.449) | 0.15   |                      |        |
| Power Doppler signal present in any joints, entheses or tendons       | 0.480 (-1.258, 2.219)  | 0.58   |                      |        |
| Power Doppler sum score in joints, entheses and tendons (range 0-347) | -0.136 (-0.561, 0.288) | 0.52   |                      |        |
| Comorbidities ≥ 1                                                     | 0.761 (-1.071, 2.593)  | 0.41   |                      |        |
| PASI, range 0-72                                                      | 0.530 (0.368, 0.692)   | <0.001 | 0.418 (0.261, 0.575) | <0.001 |
| Current bDMARD                                                        | 0.633 (-1.112, 2.378)  | 0.47   |                      |        |
| Current csDMARD                                                       | -1.524 (-3.291, 0.243) | 0.09   |                      |        |
| Ever bDMARD                                                           | 0.678 (-1.061, 2.416)  | 0.44   |                      |        |
| Ever csDMARD                                                          | 1.857 (-4.643, 0.929)  | 0.19   |                      |        |

†Not in the final multivariate model

\*With PASDAS in the model.

\*\*With DAPSA instead of PASDAS in the model only age, PASI and comorbidities remained but not DAPSA was statistically significantly associated with DLQI

CI, Confidence intervals; BMI, Body Mass Index; PsA, Psoriatic arthritis; CRP, C-Reactive Protein; TJC, Tender Joint Count; SJC, Swollen Joint Count; DAPSA, Disease Activity index for Psoriatic Arthritis; PASDAS, Psoriatic Arthritis Disease Activity Score; MASES, Maastricht Ankylosing Spondylitis Enthesitis Score; IGA, Investigator Global Assessment; VAS, Visual analogue scale; PGA, Patient Global Assessment; NRS, Numeric Rating Scale; MHAQ, Modified Health Assessment Questionnaire; PASI, Psoriasis Area Severity Index; DLQI, Dermatology Life Quality Index; bDMARDs: Biologic Disease Modifying Anti-Rheumatic Drugs; csDMARDs: Conventional synthetic DMARDs.

Supplementary Table 2b. Associations with the skin quality of life measure DLQI in female psoriatic arthritis patients tested in univariate and multivariate linear regression models.

Only variables with a p value < 0.10 in the univariate analyses were tested in the multivariate analysis, which was adjusted for age and BMI independently of their significance in the univariate analyses. Apart from age and BMI only variables with at p value < 0.01 is displayed in the multivariate analysis.

|  | Univariate analyses |         | Adjusted analyses |          |
|--|---------------------|---------|-------------------|----------|
|  | B (95% CI)          | p value | B (95% CI)        | p value* |

|                                                                       |                        |        |                        |        |
|-----------------------------------------------------------------------|------------------------|--------|------------------------|--------|
| Age, years                                                            | -0.037 (-0.132, 0.058) | 0.44   | -0.024 (-0.110, 0.062) | 0.58   |
| Male gender                                                           | NA                     |        | NA                     |        |
| BMI, kg/m <sup>2</sup> (n=63)                                         | 0.123 (-0.075, 0.320)  | 0.22   | 0.042 (-0.131, 0.216)  | 0.63   |
| Current smoking                                                       | 1.340 (-1.128, 3.807)  | 0.28   |                        |        |
| Part time/full time employed/working                                  | 0.922 (-1.002, 2.846)  | 0.34   |                        |        |
| PsA disease duration, years                                           | 0.003 (-0.156, 0.161)  | 0.97   |                        |        |
| CRP, mg/L                                                             | 0.099 (-0.119, 0.318)  | 0.37   |                        |        |
| TJC68 (n=130)                                                         | 0.026 (-0.057, 0.110)  | 0.54   |                        |        |
| SJC66 (n=130)                                                         | -0.210 (-1.209, 0.789) | 0.68   |                        |        |
| DAPSA, range 0-164                                                    | 0.041 (-0.024, 0.106)  | 0.22   |                        |        |
| PASDAS,                                                               | 2.426 (0.177, 4.675)   | 0.035  |                        |        |
| MASES, range 0-13                                                     | 0.117 (-0.174, 0.407)  | 0.43   |                        |        |
| IGA, VAS 0-100 mm                                                     | 0.015 (-0.065, 0.096)  | 0.71   |                        |        |
| PGA, VAS 0-100 mm                                                     | 0.043 (0.006, 0.079)   | 0.022† |                        |        |
| Pain, VAS 0-100 mm                                                    | 0.050 (0.010, 0.089)   | 0.015  |                        |        |
| Fatigue, VAS 0-100 mm                                                 | 0.026 (-0.004, 0.056)  | 0.089  |                        |        |
| Morning stiffness, hour                                               | 0.169 (-0.657, 0.996)  | 0.68   |                        |        |
| Sleep disturbance, NRS 0-10                                           | 0.401 (0.097, 0.706)   | 0.011  |                        |        |
| Anxiety/depression, range 1-3                                         | 0.714 (-0.800, 2.229)  | 0.35   |                        |        |
| MHAQ, range 0-3                                                       | 1.908 (-0.203, 4.019)  | 0.076  |                        |        |
| Exercise ≥1 time per week                                             | -1.309 (-3.224, 0.606) | 0.18   |                        |        |
| Power Doppler signal present in any joints, entheses or tendons       | -1.184 (-3.096, 0.727) | 0.22   |                        |        |
| Power Doppler sum score in joints, entheses and tendons (range 0-347) | -0.450 (-1.007, 0.108) | 0.11   |                        |        |
| Comorbidities ≥ 1                                                     | 0.618 (-0.275, 1.511)  | 0.17   |                        |        |
| PASI, range 0-72                                                      | 0.795 (0.526, 1.064)   | <0.001 | 0.726 (0.433, 1.018)   | <0.001 |

|                 |                        |      |  |  |
|-----------------|------------------------|------|--|--|
| Current bDMARD  | -1.651 (-3.809, 0.507) | 0.13 |  |  |
| Current csDMARD | -0.257 (-2.200, 1.686) | 0.79 |  |  |
| Ever bDMARD     | -1.080 (-3.129, 0.968) | 0.30 |  |  |
| Ever csDMARD    | 1.467 (-1.629, 4.562)  | 0.35 |  |  |

† Not in the final multivariate model

\*With PASDAS in the model.

\*\*With DAPSA instead of PASDAS in the model only age, PASI and comorbidities, but not DAPSA, were statistically significantly associated with DLQI

CI, Confidence intervals; BMI, Body Mass Index; PsA, Psoriatic arthritis; CRP, C-Reactive Protein; TJC, Tender Joint Count; SJC, Swollen Joint Count; DAPSA, Disease Activity index for Psoriatic Arthritis; PASDAS, Psoriatic Arthritis Disease Activity Score; MASES, Maastricht Ankylosing Spondylitis Enthesitis Score; IGA, Investigator Global Assessment; VAS, Visual analogue scale; PGA, Patient Global Assessment; NRS, Numeric Rating Scale; MHAQ, Modified Health Assessment Questionnaire; PASI, Psoriasis Area Severity Index; DLQI, Dermatology Life Quality Index; bDMARDs: Biologic Disease Modifying Anti-Rheumatic Drugs; csDMARDs: Conventional synthetic DMARDs.
